# Supplementary material
Source: PubMed Central journal article supplement (PMC7335264)
Supplement: NIHMS1602602-supplement-Appendix_B.pdf [file NIHMS1602602-supplement-Appendix_B.pdf]

**Appendix B. Risk calculator user interface.**

Calculator prediction 6-year risk of lung cancer

Model: Tammemagi PLCOM2012\*

Print

| COPD Emphysema or Chronic bronchitis | Personal history of cancer | Family history of cancer | Smoking status | Average number of cigarettes smoked per day | Duration smoked<br><i>Years</i> |
|--------------------------------------|----------------------------|--------------------------|----------------|---------------------------------------------|---------------------------------|
| No                                   | No                         | No                       | Current smoker | 20                                          | 30                              |

| Years ago quit smoking<br><i>Enter 0 for former smokers</i> | Age<br><i>Years</i> | BMI | Education<br><i>Highest level obtained</i> | Race<br>Ethnicity |
|-------------------------------------------------------------|---------------------|-----|--------------------------------------------|-------------------|
| 0                                                           | 55                  | 20  | Less than high school grad                 | White             |

2%

Probability of lung cancer in 6 years

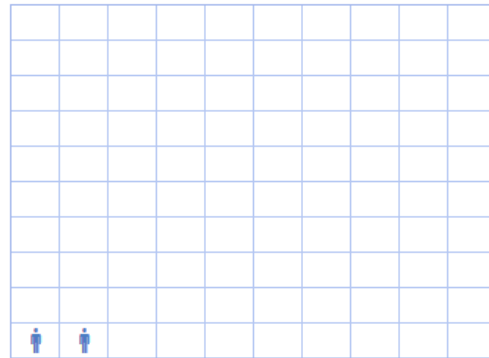

\*Tammemagi et al. *Selection Criteria for Lung-Cancer Screening*. NEJM. 2013;368(8): 728-36.

Example: The 6-year risk of lung cancer in a white individual who is 55 years old, has some college education, a BMI of 28, who is a former smoker who quit 15 years ago and smoked on average 20 cigarettes per day for 30 years is estimated to be 0.005 or 0.5%.

NOTE: This calculator was intended for non-profit, non-commercial use only. For commercial use, contact Professor Martin Tammemagi (martin.tammemagi@brocku.ca).
