# Supplementary material
Source: PubMed Central journal article supplement (PMC7335264)
Supplement: NIHMS1602602-supplement-Appendix_C.pdf [file NIHMS1602602-supplement-Appendix_C.pdf]

## Appendix C. Qualitative interview guide.

1. What made you decide to get screened?
2. Was the lung cancer screening counseling what you expected? Why or why not?
3. During the counseling, did the physician discuss your personal risk factors for lung cancer?
  - What types of risk factors were discussed?
  - Did you know about these risk factors from your own research or was any of it this new information to you?
4. In discussing your risk factors, did the physician share a risk calculator with you? *(If needed: a risk calculator predicts a person's own risk of developing lung cancer, based on a number of facts about them.)*
  - What were your impressions of the risk calculator?
  - Have you ever seen or used a risk calculator before (how/when)?
5. Do you remember what number the risk calculator gave regarding your chance of developing lung cancer?
  - Were you surprised by this number? Why or why not?
  - Was it helpful to get a number? Why or why not?
  - Was anything confusing about the number?
  - Did you trust the number/calculator? Why or why not?
6. If you had to guess your risk prior to seeing the risk calculator's output, what number would you have guessed? Why?
7. Did seeing the results of this model affect your decision to proceed with getting scanned? Why or why not?
8. Did your doctor give you a printout of the model with your information on it?
  - Did you keep it/share it with family/friends?
  - Was having a printed copy helpful?
9. How could we improve this calculator—any suggestions? How could we improve the lung cancer screening counseling process?
