# Supplementary material
Source: PubMed Central journal article supplement (PMC7335264)
Supplement: NIHMS1602602-supplement-Appendix_D.pdf [file NIHMS1602602-supplement-Appendix_D.pdf]

## Appendix D. Multivariable model parameter estimates.

### 1. Perceived lung cancer risk

| Variable                            | Parameter estimate | 95% Confidence Interval | p      |
|-------------------------------------|--------------------|-------------------------|--------|
| Age                                 |                    | -                       | 0.740  |
| 55-59                               | (ref)              |                         |        |
| 60-64                               | -2.10              | [-16.47, 12.28]         |        |
| 65-69                               | -6.70              | [-20.51, 7.11]          |        |
| 70-75                               | -7.56              | [-26.95, 11.83]         |        |
| Gender                              |                    | -                       | 0.663  |
| Female                              | (ref)              |                         |        |
| Male                                | -2.58              | [-13.43, 8.28]          |        |
| Lung Cancer Risk                    |                    | -                       | 0.883  |
| 1 – 2%                              | (ref)              |                         |        |
| >2 – 4.33%                          | 5.84               | [-10.16, 21.84]         |        |
| > 4.33 – 30%                        | 4.20               | [-12.36, 20.76]         |        |
| Time                                |                    | -                       | <0.001 |
| Pre-counseling                      | (ref)              |                         |        |
| Post-counseling                     | -29.56             | [-39.33, -19.78]        |        |
| Lung Cancer Risk x Time Interaction |                    |                         | 0.005  |

### 2. Perceived uncertainty about lung cancer risk

| Variable        | Parameter estimate | 95% Confidence Interval | p     |
|-----------------|--------------------|-------------------------|-------|
| Age             |                    | -                       | 0.645 |
| 55-59           | (ref)              |                         |       |
| 60-64           | 0.14               | [-0.39, 0.67]           |       |
| 65-69           | -0.17              | [-0.69, 0.34]           |       |
| 70-75           | 0.01               | [-0.70, 0.71]           |       |
| Gender          |                    | -                       | 0.236 |
| Female          | (ref)              |                         |       |
| Male            | -0.25              | [-0.66, 0.16]           |       |
| Time            |                    | -                       | 0.062 |
| Pre-counseling  | (ref)              |                         |       |
| Post-counseling | 0.31               | [-0.02, 0.63]           |       |

### 3. Interest in lung cancer screening

| Variable        | Parameter estimate | 95% Confidence Interval | p            |
|-----------------|--------------------|-------------------------|--------------|
| Age             |                    | -                       | 0.906        |
| 55-59           | (ref)              |                         |              |
| 60-64           | -0.06              | [-0.44, 0.32]           |              |
| 65-69           | 0.03               | [-0.32, 0.37]           |              |
| 70-75           | 0.09               | [-0.34, 0.52]           |              |
| Gender          |                    | -                       | 0.646        |
| Female          | (ref)              |                         |              |
| Male            | -0.07              | [-0.33, 0.20]           |              |
| Time            |                    | -                       | <b>0.001</b> |
| Pre-counseling  | (ref)              |                         |              |
| Post-counseling | 0.34               | [0.15, 0.53]            |              |

### 4. Interest in smoking cessation

| Variable        | Parameter estimate | 95% Confidence Interval | p     |
|-----------------|--------------------|-------------------------|-------|
| Age             |                    | -                       | 0.327 |
| 55-59           | (ref)              |                         |       |
| 60-64           | 0.30               | [-1.13, 1.73]           |       |
| 65-69           | -0.77              | [-2.24, 0.70]           |       |
| 70-75           | 0.07               | [-2.95, 3.10]           |       |
| Gender          |                    | -                       | 0.139 |
| Female          | (ref)              |                         |       |
| Male            | 0.96               | [-0.20, 2.11]           |       |
| Time            |                    | -                       | 0.852 |
| Pre-counseling  | (ref)              |                         |       |
| Post-counseling | 0.27               | [-0.94, 1.47]           |       |

### 5. Personal risk threshold for screening

| Variable        | Parameter estimate | 95% Confidence Interval | p                |
|-----------------|--------------------|-------------------------|------------------|
| Age             |                    | -                       | 0.881            |
| 55-59           | (ref)              |                         |                  |
| 60-64           | -4.62              | [-20.93, 11.69]         |                  |
| 65-69           | -0.20              | [-16.02, 15.61]         |                  |
| 70-75           | -6.20              | [-26.81, 14.41]         |                  |
| Gender          |                    | -                       | 0.860            |
| Female          | (ref)              |                         |                  |
| Male            | 1.45               | [-11.12, 14.02]         |                  |
| Time            |                    | -                       | <b>&lt;0.001</b> |
| Pre-counseling  | (ref)              |                         |                  |
| Post-counseling | -12.23             | [-18.31, -6.14]         |                  |

Multivariable repeated-measures Analysis of Variance (ANOVA) models; ref – reference class
